# Supplementary material for: Mental health and adjustment to juvenile idiopathic arthritis: Level of agreement between parent and adolescent reports according to Strengths and Difficulties Questionnaire and Adolescent Outcomes Questionnaire
Source: PLoS One. 2017 Mar 10;12(3):e0173768. doi: 10.1371/journal.pone.0173768 (PMC5345873; doi:10.1371/journal.pone.0173768)
Supplement: S1 File — (XLS) [file pone.0173768.s001.xls]

## Sheet: adolescents 
patient no.	gender	disease course	age	disease duration (moths)	weight	height	no joints affected by arthritis	Methotrexate (mg/ m2 of body surface per week)	Glucocorticoids (mg/kg/per day)	Cyclosporine A (mg/kg/per day)	Etanercept mg/kg/dose 2 times per week	KGR1_1P	KGR1_2P	KGR1_3P	KGR1_4P	KGR1_5P	KGR1_6P	KGR1_7P	KGR1_8P	KGR1_9P	KGR1_10P	KGR1_11P	KGR1_12P	KGR1_13P	KGR1_14P	KGR1_15P	KGR1_16P	KGR1_17P	KGR1_18P	KGR1_19P	KGR1_20P	KGR1_21P	KGR1_22P	KGR1_23P	KGR1_24P	KGR1_25P	KGD1_1P	KGD1_2P	KGD1_3P	KGD1_4P	KGD1_5P	KGD1_6P	KGD1_7P	KGD1_8P	KGD1_9P	KGD1_10P	KGD1_11P	KGD1_12P	KGD1_13P
1	M	B	17	3	44	162	4	20	4	0	0	0	0	0	1	1	1	2	1	0	1	2	0	1	2	1	1	0	0	0	1	2	0	0	0	2	0	0	0	0	1	0	2	0	0	0	2	0	0
2	K	A	15	8	43	151	1	15	2	100	0	0	0	0	1	0	0	2	0	0	0	2	0	0	2	0	0	1	0	0	0	2	0	1	0	2	0	0	0	0	0	0	2	0	0	0	2	0	0
3	M	A	17	4	55	172	1	15	2	100	0	0	0	0	0	0	0	2	0	0	0	2	0	0	1	0	0	1	0	0	0	2	0	0	0	2	0	0	0	1	0	0	2	0	0	0	2	0	0
4	K	B	17	1	71	162	6	20	8	0	0	0	0	0	0	1	0	0	2	2	2	0	0	0	2	1	1	0	0	0	1	1	0	0	0	1	0	0	0	0	1	0	2	0	0	0	2	0	0
5	K	B	17	2	63	171	0	15	10	150	0	0	0	0	0	0	0	1	0	0	0	2	0	0	2	1	1	0	0	0	0	1	0	0	0	1	0	0	0	0	0	0	2	0	0	0	2	0	0
6	M	B	17	3	64	170	2	20	4	0	0	0	0	0	0	0	0	1	0	0	0	2	0	0	2	0	0	0	0	0	1	1	0	0	0	2	0	0	0	1	0	0	2	0	0	0	2	0	0
7	M	B	15	48	49	158	4	20	16	0	0	1	2	0	1	0	1	2	0	0	0	1	0	0	2	1	1	1	0	0	1	1	0	0	0	1	1	1	0	0	1	1	2	0	0	0	1	0	0
8	K	B	16	5	56	162	2	15	0	0	50	0	0	1	0	1	0	1	0	0	0	2	0	2	2	0	0	0	0	0	1	1	0	1	0	1	0	0	1	0	1	0	1	0	0	0	2	0	2
9	M	B	15	14	36	122	6	15	4	0	0	2	0	1	0	1	0	0	0	2	1	1	1	1	1	0	0	2	2	0	1	2	0	1	0	2	0	0	0	0	0	0	0	0	1	0	1	0	0
10	M	B	17	15	28	128	2	15	4	0	0	0	0	0	1	1	0	1	1	0	0	2	0	0	2	0	0	1	0	0	1	1	0	1	0	1	0	0	0	0	0	0	1	0	0	0	2	0	0
11	M	A	16	2	45	167	0	12.5	6	0	0	1	1	1	1	1	1	1	1	1	1	2	0	1	1	1	1	1	0	0	1	1	0	2	1	1	1	1	0	1	1	0	1	1	1	1	2	0	1
12	M	B	13	6	51	165	8	15	8	0	0	0	0	0	0	0	0	1	0	0	0	2	0	0	2	1	1	0	0	0	1	1	0	1	0	1	0	0	0	0	1	0	1	0	0	0	2	0	0
13	M	A	15	12	31	134	1	10	4	100	25	1	0	0	1	1	1	1	0	0	0	2	0	1	1	1	1	0	0	0	1	1	0	2	0	1	1	0	0	1	1	1	1	0	1	0	1	0	1
14	K	B	18	3	43	161	0	15	0	0	34	1	0	0	1	0	0	1	0	0	0	2	0	0	2	0	1	0	0	0	0	1	0	0	0	2	0	0	0	0	0	0	1	0	0	0	2	0	0
15	M	A	12	2	34	137	2	10	8	0	0	0	2	0	0	0	0	2	1	0	1	2	0	0	2	1	1	0	0	2	0	1	0	1	0	2	0	1	0	0	2	0	1	2	0	1	2	0	0
16	M	B	12	108	36	148	1	0	0	100	25	1	0	0	0	0	0	1	0	1	0	2	0	0	2	1	0	0	0	0	1	1	0	1	0	1	0	0	0	0	0	0	1	0	0	0	2	0	0
17	K	A	15	4	43	151	1	10	4	0	0	0	0	0	0	0	1	2	0	0	0	2	0	0	2	0	1	0	0	0	0	1	0	1	0	2	0	0	0	0	0	1	2	0	0	0	2	0	0
18	K	B	12	8	30	136	1	0	2	75	25	0	0	0	0	0	0	1	0	0	0	2	0	0	2	2	1	0	0	0	0	2	0	1	0	2	0	0	0	0	0	0	2	0	0	0	2	0	0
19	K	A	13	8	36	141	0	15	0	0	30	0	0	0	0	1	0	2	0	0	0	2	0	0	2	0	1	1	0	0	0	1	0	0	0	2	0	0	0	0	1	0	2	0	0	0	2	0	0
20	M	A	12	4	62	152	1	20	4	0	0	1	1	0	0	1	0	1	0	0	1	2	0	0	2	1	0	0	0	0	1	1	0	0	0	1	1	1	0	1	1	0	1	0	0	1	2	0	0
21	K	A	16	1	64	168	1	20	0	0	0	0	0	0	0	0	0	2	0	0	0	2	0	0	2	1	0	0	0	0	1	1	0	0	0	2	0	0	0	0	0	0	1	0	1	0	2	0	0
22	K	B	15	14	17	122	12	15	0	50	0	0	0	0	0	0	1	2	0	0	0	2	0	0	2	0	1	0	0	0	0	2	0	1	0	2	0	0	0	0	1	1	2	0	0	0	2	0	0
23	M	A	17	8	68	170	1	15	0	0	50	0	0	0	0	1	0	2	0	0	0	2	0	0	2	1	1	1	0	0	0	1	0	0	0	2	1	0	0	0	0	2	2	0	1	0	2	0	0
24	M	A	15	6	72	149	0	10	0	0	50	1	2	0	0	1	0	2	0	1	0	2	0	0	2	0	0	0	0	0	0	1	0	0	0	1	0	0	0	0	0	0	1	0	1	0	2	0	0
25	K	A	11	12	48	152	1	15	6	0	0	0	0	0	0	0	0	2	0	0	0	2	0	0	2	0	0	0	0	0	0	2	0	1	0	2	0	0	0	0	0	0	1	0	0	0	2	0	0
26	K	B	16	1	65	173	5	0	4	150	0	0	0	0	0	0	1	2	1	0	0	2	0	0	1	0	1	0	0	0	0	2	0	2	0	2	0	0	0	0	0	1	2	0	0	0	2	0	0
												SDQ-PARENT																									SDQ-PATIENT
	M- boys	A-Pauciarticular
	K- gils	b- Polyarticular
[truncated: 12 more columns]
